# Supplementary material for: Exfoliation of WS2in the semiconducting phase using a group of lithium halides: a new method of Li intercalation
Source: Royal Society of Chemistry journal article supplement (doi:10.1039/c6dt02823c), 2016-01-01
Supplement: c6dt02823c1.pdf [file c6dt02823c1.pdf]

## Electronic Supporting Information

### **Exfoliation of WS<sub>2</sub> in Semiconducting Phase using a Group of Lithium Halides: a New Method of Li Intercalation**

*Arup Ghorai,<sup>1</sup> Anupam Midya<sup>1\*</sup> Rishi Maiti,<sup>2</sup> Samit K Ray<sup>2</sup>*

<sup>1</sup>*School of Nanoscience and Technology, Indian Institute of Technology Kharagpur, Kharagpur 721302*

<sup>2</sup>*Department of Physics, Indian Institute of Technology Kharagpur, Kharagpur 721302*

Email: [anupam.midya@iitkgp.ac.in](mailto:anupam.midya@iitkgp.ac.in)

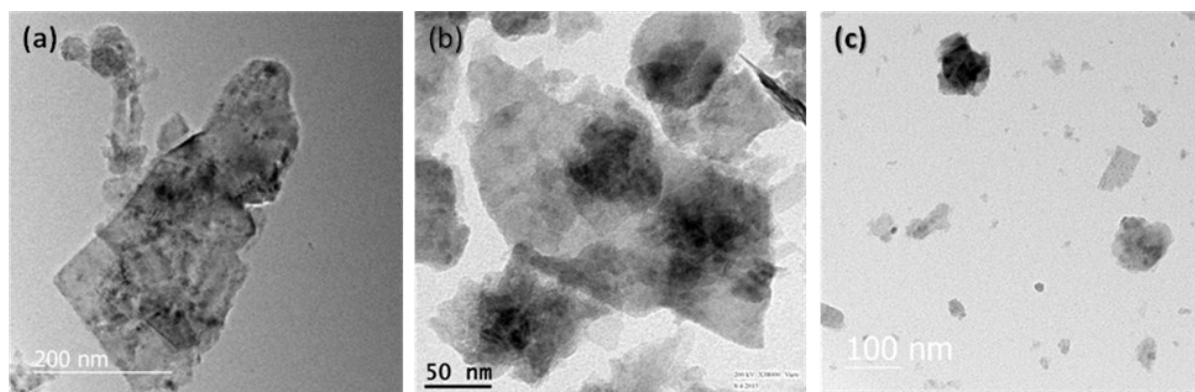

**Figure S1:** TEM images of few layer WS<sub>2</sub> flakes collected at (a) below 1000 rpm (WS<sub>2</sub> (1K), average size  $\geq 500$  nm); (b) below 2000 rpm (WS<sub>2</sub> (2K), average size  $\sim 300$  nm); (c) collected above 3000 rpm (WS<sub>2</sub> (3K), average size  $\leq 100$  nm).

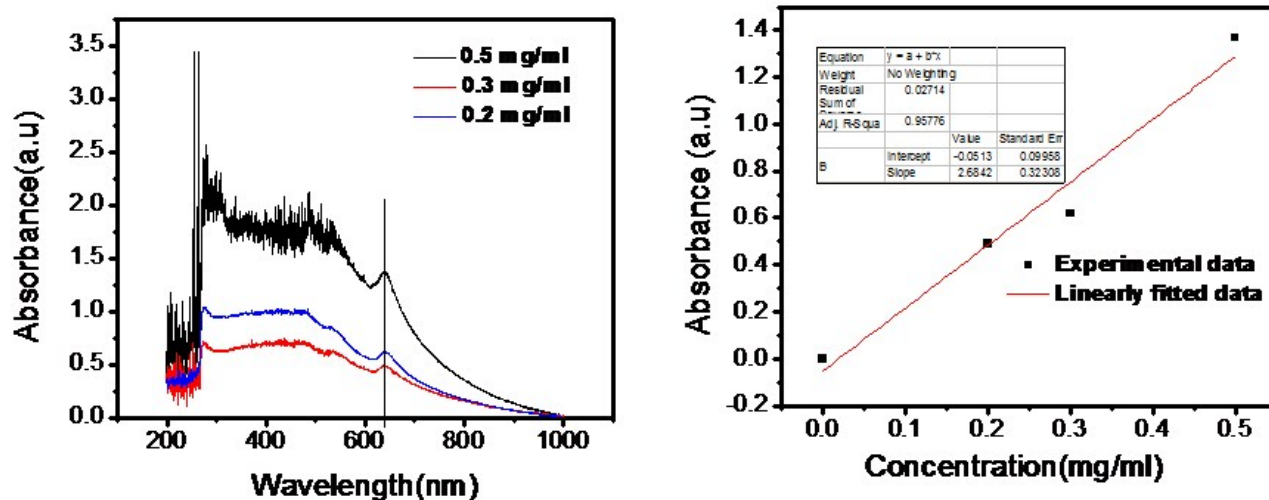

**Figure S2:** (a) Absorbance of WS<sub>2</sub> in DMF at 640 nm and (b) its corresponding absorbance with concentration. From the fitted curve slope, absorption coefficient is 2.68 ml mg<sup>-1</sup> cm<sup>-1</sup> at 640 nm.

**Table S1**

| WS <sub>2</sub> :Alkali halide<br>(mole ratio) | LiCl,<br>(4h sonication<br>at the first step) |
|------------------------------------------------|-----------------------------------------------|
| (1:1)                                          | ~5.5 mg / mL                                  |
| (2:1)                                          | ~2 mg/ml                                      |
| (1:2)                                          | ~1 mg/ml                                      |
| 1:0                                            | 0                                             |

$$\sigma_{sl} = \sigma_{solid} + \sigma_{liquid} - 2 \left( \sqrt{\sigma_{solid}^d \sigma_{liquid}^d} + \sqrt{\sigma_{solid}^p \sigma_{liquid}^p} \right)$$

$$= \sigma_{solid}^d + \sigma_{solid}^p + \sigma_{liquid}^d + \sigma_{liquid}^p - 2\left(\sqrt{\sigma_{solid}^d \cdot \sigma_{liquid}^d} + \sqrt{\sigma_{solid}^p \cdot \sigma_{liquid}^p}\right)$$

Where  $\sigma_{solid}$  and  $\sigma_{liquid}$  are the surface tension of the solid and solvent, respectively and  $p$  indicates the polar component and  $d$  represents the dispersive component of surface tension.  $\sigma_{sl}$  is the interfacial surface tension between liquid solvent and solid. For efficient exfoliation  $\sigma_{sl}$  should be minimised.<sup>1</sup> Thus the polar and dispersive part of the surface tension played an important role in liquid phase exfoliation. Generally the solvents having surface tension value around 40 mN/m (DMF-37.1 and for Hexane-18.43 mN/m) are good exfoliating agent for exfoliation,<sup>2</sup> because those solvents have lower interfacial surface tension. The ratio of  $\sigma_{solid}^p$  to  $\sigma_{solid}^d$  of WS<sub>2</sub> is around 0.563 and surface tension is around 40 mN/m.<sup>2</sup> The interfacial surface tension is calculated for WS<sub>2</sub> in DMF as 0.86 mN/m and that of WS<sub>2</sub> in hexane as 15.5 mN/m.

The solvents which have minimum interfacial surface energy are a good solvent for liquid exfoliation.

As we know that total surface tension  $\sigma_{solid}$  is equal to the sum of polar and dispersive components of the surface tension. So we can write

$$\sigma_{solid} = \sigma_{solid}^d + \sigma_{solid}^p \dots\dots\dots (2)$$

Now total surface tension of WS<sub>2</sub> is 40 mN/m, so we can write,

$$\sigma_{solid}^{WS2} = \sigma_{solid}^{d(WS2)} + \sigma_{solid}^{p(WS2)} = 40 \dots\dots\dots (3)$$

Again we know that the ratio of  $\sigma_s^p$  and  $\sigma_s^d$  of WS<sub>2</sub> is around 0.563, so

$$\sigma_{solid}^{p(WS2)} / \sigma_{solid}^{d(WS2)} = 0.563 \dots\dots\dots (4)$$

From equation (2) we can calculate,

$$\sigma_{solid}^{d(WS_2)} - \sigma_{solid}^{p(WS_2)} = 11.18 \dots\dots\dots(5)$$

By solving equation (1) and (3) we get,  $\sigma_{solid}^{p(WS_2)} = 14.91$  and  $\sigma_{solid}^{d(WS_2)} = 25.09$

So using this value we calculate the interfacial surface tension of different solvents which is shown in following table S2. The exfoliation yield is also tabulated for comparison.

**Table: S2**

| Solvent         | Surface Tension (mN/m) ( $\sigma$ ) | Polar Component of Surface Tension (mN/m) ( $\sigma_{liquid}^p$ ) | Dispersive Component of Surface Tension (mN/m) ( $\sigma_{liquid}^d$ ) | Interfacial Surface Tension between WS <sub>2</sub> and solvents (mN/m) ( $\sigma_{sl}$ ) | Experimental Yield (mg/ml) LiI, 30 min sonication 1st step |
|-----------------|-------------------------------------|-------------------------------------------------------------------|------------------------------------------------------------------------|-------------------------------------------------------------------------------------------|------------------------------------------------------------|
| DMF             | 36.50                               | 11.30                                                             | 25.20                                                                  | 0.26                                                                                      | 4.81                                                       |
| EtOH            | 23.70                               | 4.40                                                              | 19.30                                                                  | 3.52                                                                                      | 0.18                                                       |
| IPA:Water (1:1) | 25.13                               | 8.17                                                              | 16.96                                                                  | 1.81                                                                                      | 1.1                                                        |
| Water           | 72.75                               | 50.65                                                             | 22.10                                                                  | 10.71                                                                                     | 0                                                          |
| Hexane          | 18.43                               | 0                                                                 | 18.43                                                                  | 15.499                                                                                    | 0                                                          |
| Acetone         | 23.30                               | 16.50                                                             | 6.80                                                                   | 5.82                                                                                      | 0                                                          |
| NMP             | 40.79                               | 11.58                                                             | 29.21                                                                  | 0.59                                                                                      | 2.5                                                        |

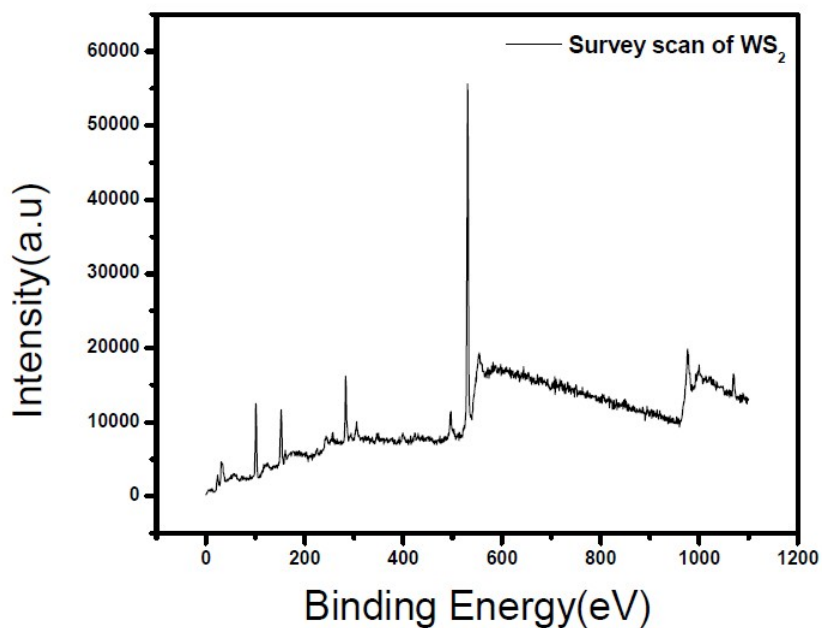

**Figure S3:** XPS Survey scan of WS<sub>2</sub> nanosheet

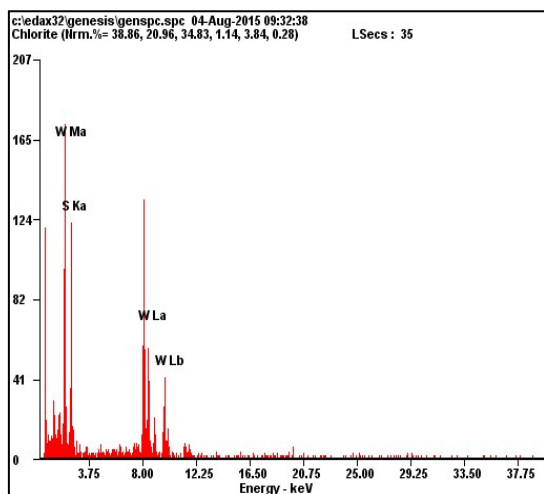

| <i>Element</i> | <i>Wt %</i> | <i>At %</i> |
|----------------|-------------|-------------|
| <i>W M</i>     | 69.53       | 31.04       |
| <i>S K</i>     | 26.20       | 67.05       |
| <i>W L</i>     | 04.28       | 01.91       |

**Figure S4:** EDAX spectra of WS<sub>2</sub> nanosheet

---

<sup>1</sup> Shen, J.; He, Y.; Wu, J.; Gao, C.; Keyshar, K.; Zhang, X.; Yang, Y.; Ye, M.; Vajtai, R.; Lou, J.; Ajayan, P. M. Liquid Phase Exfoliation of Two-Dimensional Materials by Directly Probing and Matching Surface Tension Components. *Nano Lett.* **2015**, *15*, 5449–5454.

---

<sup>2</sup> Cunningham, G.; Lotya, M.; Cucinotta, C. S.; Sanvito, S.; Bergin, S. D.; Menzel, R.; Shaffer, M. S. P.; Coleman, J. N. Solvent Exfoliation of Transition Metal Dichalcogenides: Dispersibility of Exfoliated Nanosheets Varies Only Weakly between Compounds. *ACS Nano* **2012**, *6*, 3468–3480.
